# Supplementary material for: The ability of apolipoprotein E fragments to promote intraneuronal accumulation of amyloid beta peptide 42 is both isoform and size-specific
Source: PubMed Central journal article supplement (PMC4967930; doi:10.1038/srep30654), 2016-08-01
Supplement: srep30654-s1.pdf [file srep30654-s1.pdf]

## The ability of apolipoprotein E fragments to promote intraneuronal accumulation of amyloid beta peptide 42 is both isoform and size-specific

Ioannis Dafnis, Letta Argyri, Marina Sagnou, Athina Tzinia, Effie C. Tsilibary, Efstratios Stratikos and Angeliki Chroni

### SUPPLEMENTAL FIGURES

#### A. A $\beta$ 42-24h

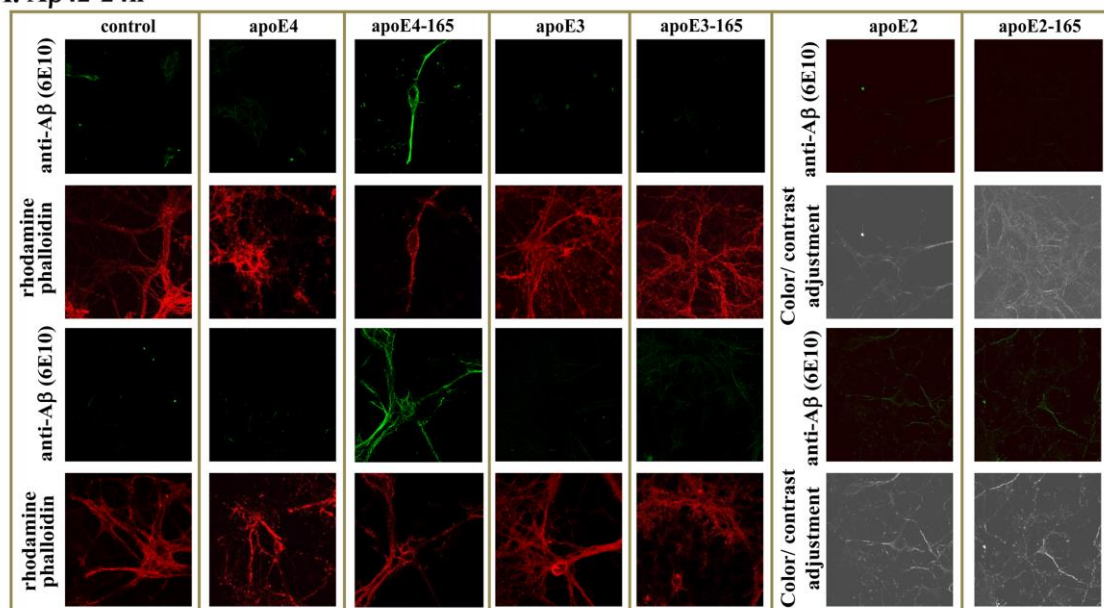

#### B. A $\beta$ 42-24h, removal of A $\beta$ 42 and apoE4-165 -24h

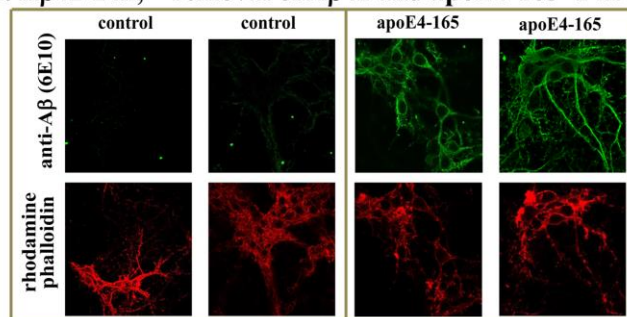

### Supplemental Figure 1. Fluorescence confocal laser scanning microscopy of primary mouse cortical neurons incubated in the presence of A $\beta$ 42 and full-length apoE or truncated apoE-165 forms.

A. Primary mouse cortical neurons were incubated with 25 ng/ml A $\beta$ 42 in the absence (control) or presence of 375 nM lipid-free full-length apoE or apoE-165 forms for 24 h, as indicated in each panel.

B. Primary mouse cortical neurons were also incubated with 25 ng/ml A $\beta$ 42 in the absence (control) or presence of 375 nM lipid-free apoE4-165 for 24 h and then washed and incubated further in fresh medium without A $\beta$ 42 or apoE4-165 for 24 more hours, as indicated. A $\beta$  immunostaining of cells was detected with the antibody 6E10 followed by a FITC-conjugated secondary antibody (green). The F-actin staining of cells using rhodamine phalloidin (red) or greyscale images of increased brightness/contrast are shown to facilitate the visualisation of cells outline, especially in the images with very low A $\beta$  immunostaining.

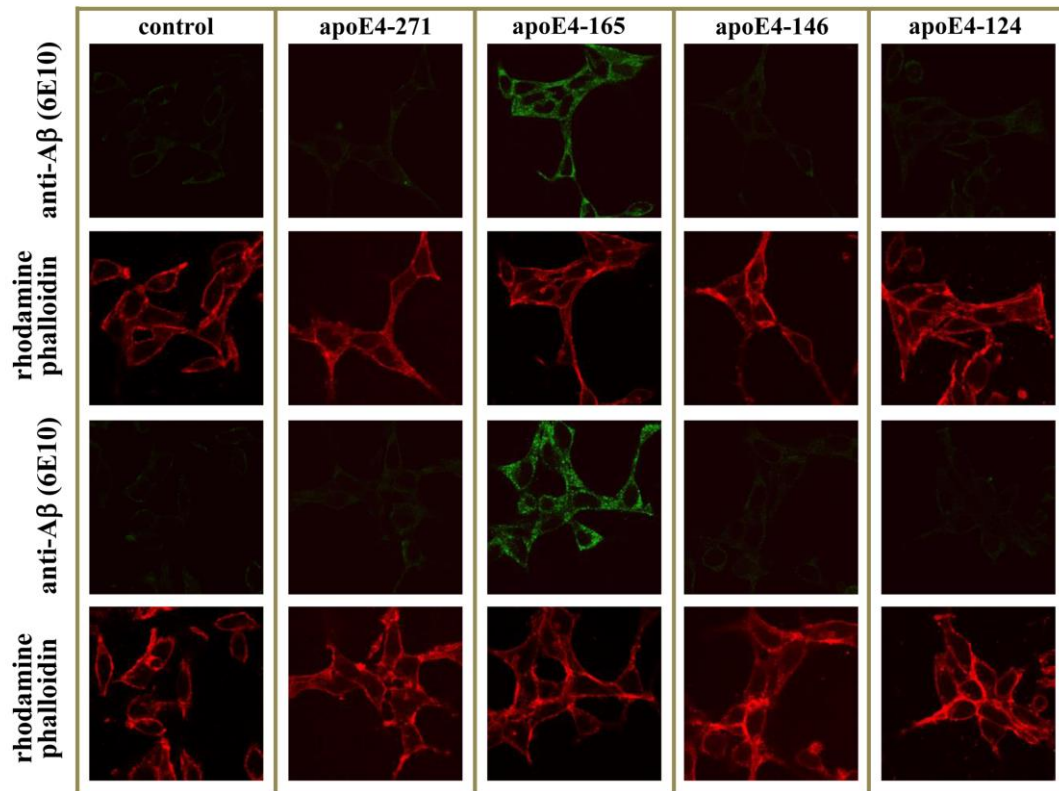

**Supplemental Figure 2. Fluorescence confocal laser scanning microscopy of SK-N-SH cells incubated in the presence of A $\beta$ 42 and carboxy-terminal truncated apoE4 forms.** SK-N-SH cells were incubated with 25 ng/ml A $\beta$ 42 in the absence (control) or presence of 375 nM lipid-free carboxyl-terminal truncated apoE4 forms for 24 h, as indicated in each panel. A $\beta$  immunostaining of cells was detected with the antibody 6E10 followed by an FITC-conjugated secondary antibody (green). The F-actin staining of cells using rhodamine phalloidin (red) is shown to facilitate the visualisation of cells outline, especially in the images with very low A $\beta$  immunostaining.

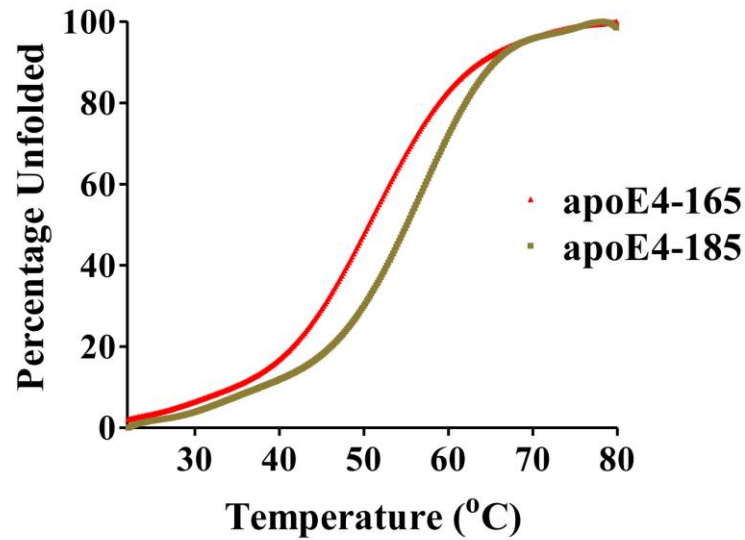

|                  | Thermal denaturation             |            |               | ANS binding                  |
|------------------|----------------------------------|------------|---------------|------------------------------|
|                  | T <sub>m</sub> (°C) <sup>1</sup> | slope      | ΔH (Kcal/mol) | (fold increase) <sup>1</sup> |
| <b>apoE4-185</b> | 56.9                             | 4.0        | 36.7          | 1.5                          |
| <b>apoE4-165</b> | <b>51.1</b>                      | <b>3.7</b> | <b>33.6</b>   | <b>2.3</b>                   |

<sup>1</sup> The values have been published in: Chroni, A., Pyrpassopoulos, S., Thanassoulas, A., Nounesis, G., Zannis, V. I., and Stratikos, E. (2008) Biophysical analysis of progressive C-terminal truncations of human apolipoprotein E4: insights into secondary structure and unfolding properties, *Biochemistry* 47, 9071-9080.

**Supplemental Figure 3. Physicochemical properties of the carboxyl-terminal truncated apoE4 forms apoE4-165 and apoE4-185.** The graph shows the thermal denaturation profiles of apoE4-165 and apoE4-185. Y-axis has been normalized to correspond to the percentage of the protein in the unfolded state. Experimental data were fit to a simple two-state Boltzmann transition. Apparent T<sub>m</sub> values have been published previously (Chroni et al, *Biochemistry* 2008). ΔH values were calculated as described under “Materials and Methods”. “Slope” is the calculated slope of the linear component of the thermal denaturation transition around T<sub>m</sub>. Fold-increase values that show the increase in ANS fluorescence in the presence of the protein relative to free ANS in the same buffer have been published previously (Chroni et al, *Biochemistry* 2008).
